# Supplementary material for: Copper uptake by DMT1: a compensatory mechanism for CTR1 deficiency in human umbilical vein endothelial cells
Source: Royal Society of Chemistry journal article supplement (doi:10.1039/c5mt00097a), 2015-06-05
Supplement: c5mt00097a1.pdf [file c5mt00097a1.pdf]

## Supplemental Information

**Fig S1**

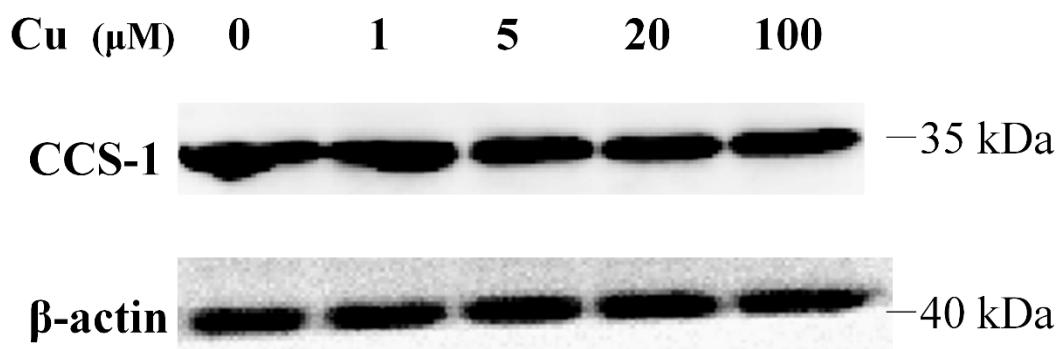

### Figure Legend

Fig S1. Western blotting analysis of changes in CCS-1 proteins in response to copper exposure. Data were collected from three independent experiments and expressed as mean  $\pm$  S.E.M.
